# Supplementary material
Source: publisher figshare collection journal article supplement (https://sage.figshare.com/ndownloader/files/11003753)
Supplement: Supplementary file 1 [file 11003753]

Supplemental Table 1- Primers used in RT-PCR

|  | **Forward Primer** | **Reversed Primer** | **Temp** |
| --- | --- | --- | --- |
| **B-actin** | GTGGGCATGGGTCAGAAG | TCCATCACGATGCCAGTG | 60C |
| **CD44s** | AACCGTGATGGCACCCGCTATGTC | GGACCAGAGGTTGTGTTTGCTCCA | 70C |
| **HAS1** | CCACTGTGTATCCTGCATCA | CTTGGTAGCATAACCCATGC | 58C |
| **HAS2** | AATTACCCAGTCCTGGCTTC | CCCCCGATAACAGAAAATCT | 58C |
| **HAS3** | AGCCTTGGCTACCGAACTAA | TATAACCGTGGCAATGAGGA | 58C |
| **HYAL1** | CTGGGTGAGCTGGGAAAATA | GCAGGGTTAAGGAGGAGGAG | 66C |
| **HYAL2** | TTGTGAGCTTCCGTGTTCAG | GTCTCCGTCTTGTGGTGTA | 66C |
